# Supplementary material
Source: HighWire-hosted journal article supplement (https://gh.bmj.com/content/6/4/e004377)

Appendix 4. Geographic settings of included studies.  $N > 37$  because one study examined disaster exposure and VAWG in two countries.

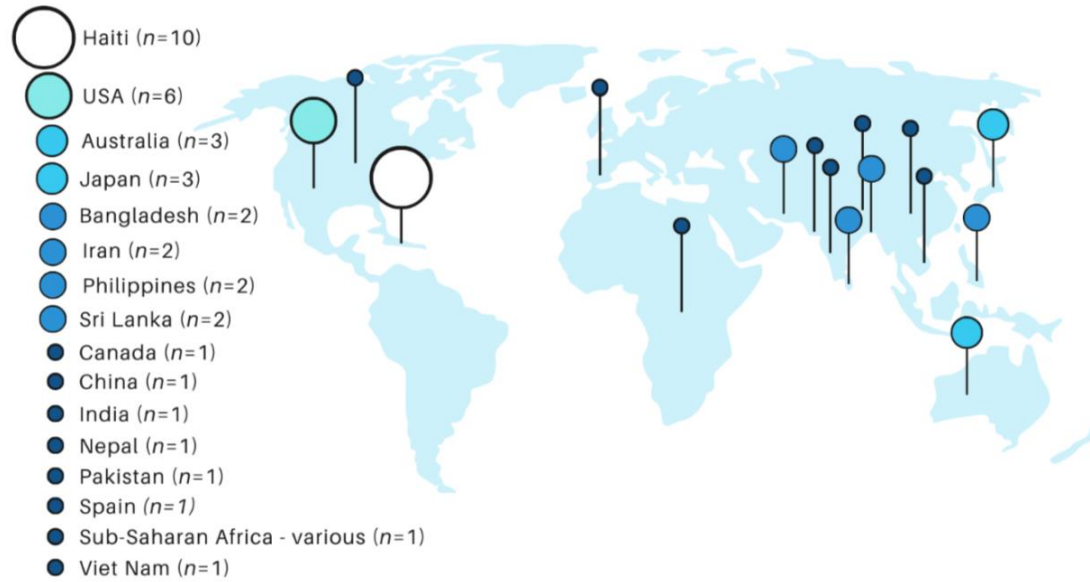

Supplement: inline-supplementary-material-4 [file inline-supplementary-material-4.pdf]
